# Supplementary material for: Modifiable predictors of health literacy in working-age adults - A rapid review and meta-analysis
Source: Research Square preprint supplement (doi:10.21203/rs.3.rs-1512443/v1), 2022-04-12
Supplement: Supplementary file 1 [file 29456c9a8e25643e6d7c1a47.xlsx]

## Sheet: Risk of bias analyses
Author	Clear research question	Specification study population	Participation rate of eligible persons at least 50%?	Homogeneity study population	Sample size justification	Exposure measurement prior to outcome measurement	Sufficient timeframe to follow-up	Different level of exposure measures (for e.g. categories)	Reliability and validity exposure measure	Exposure measured repeatedly	Valid outcome measure	Assessors blinded to the exposure status of participants?	Loss to follow-up after baseline 20% or less?	Adjustment key confounders	How was the quality rating overall?
Almubark et al. 2019	Yes	Yes	Can't be determined	Yes	Yes	No	Can't be determined	Yes	Yes	No	Yes	Can't be determined	Can't be determined	Yes	Good
Amoah et al. 2019	Yes	Yes	Can't be determined	Yes	Yes	No	Can't be determined	Yes	Yes	No	Yes	Can't be determined	Can't be determined	Yes	Good
Ansari et al. 2018	Yes	Yes	Yes	Yes	Yes	No	Can't be determined	Yes	Yes	No	Yes	Can't be determined	Can't be determined	No	Fair
Apolinario et al. 2013	Yes	Yes	Can't be determined	Yes	No	No	Can't be determined	Yes	Yes	No	Yes	Can't be determined	Can't be determined	Yes	Good
Aygun et al. 2020	Yes	Yes	Can't be determined	Yes	Yes	No	Can't be determined	Yes	Yes	No	Yes	Can't be determined	Can't be determined	Yes	Good
Bazaz et al. 2017	Yes	Yes	Can't be determined	Yes	Yes	No	Can't be determined	Yes	Yes	No	Yes	Can't be determined	Can't be determined	Yes	Good
Beccera et al. 2015	Yes	Yes	No	Yes	Yes	No	Can't be determined	Yes	Yes	No	Yes	Can't be determined	Can't be determined	Yes	Good
Beccera et al. 2016	Yes	Yes	Can't be determined	Yes	No	No	Can't be determined	Yes	Yes	No	Yes	Can't be determined	Can't be determined	Yes	Good
Blizniuk et al. 2014	Yes	Yes	Can't be determined	Yes	No	No	Can't be determined	Yes	Yes	No	Yes	Can't be determined	Can't be determined	Yes	Fair
Boyas et al. 2013	Yes	Yes	Can't be determined	Yes	No	No	Can't be determined	Yes	Yes	No	Yes	Can't be determined	Can't be determined	Yes	Good
Chang et al. 2018	Yes	Yes	Can't be determined	Yes	No	No	Can't be determined	Yes	Yes	No	Yes	Can't be determined	Can't be determined	No	Fair
Choi et al. 2013	Yes	Yes	Can't be determined	Yes	No	No	Can't be determined	Yes	Yes	No	Yes	Can't be determined	Can't be determined	No	Fair
Cho et al. 2020	Yes	Yes	Can't be determined	Yes	No	No	Can't be determined	Yes	Yes	No	Yes	Can't be determined	Can't be determined	Yes	Good
Dashti et al. 2017	Yes	Yes	Can't be determined	Yes	No	No	Can't be determined	Yes	Yes	No	Yes	Can't be determined	Can't be determined	Yes	Fair
Del Giudice et al. 2018	Yes	Yes	Can't be determined	No	No	No	Can't be determined	Yes	Yes	No	Yes	Can't be determined	Can't be determined	No	Fair
Denuwara et al. 2017	Yes	Yes	Can't be determined	Yes	Yes	No	Can't be determined	Yes	Yes	No	Yes	Can't be determined	Can't be determined	Yes	Good
Emiral et al. 2021	Yes	Yes	No	Yes	Yes	No	Can't be determined	Yes	Yes	No	Yes	Can't be determined	Can't be determined	Yes	Fair
Galle et al. 2020	Yes	Yes	Can't be determined	Yes	No	No	Can't be determined	Yes	Yes	No	Yes	Can't be determined	Can't be determined	Yes	Fair
Gantz et al. 2019	Yes	Yes	Can't be determined	Yes	Yes	No	Can't be determined	Yes	Yes	No	Yes	Can't be determined	Can't be determined	Yes	Fair
Hobbs et al. 2021	Yes	Yes	Can't be determined	Yes	No	No	Can't be determined	Yes	Yes	No	Yes	Can't be determined	Can't be determined	No	Fair
Housten et al. 2019	Yes	Yes	Can't be determined	Yes	No	No	Can't be determined	Yes	Yes	No	Yes	Can't be determined	Can't be determined	Yes	Fair
Jamieson et al. 2013	Yes	Yes	Can't be determined	Yes	No	No	Can't be determined	Yes	Yes	No	Yes	Can't be determined	Can't be determined	No	Fair
Jeong et al. 2016	Yes	Yes	No	Yes	No	No	Can't be determined	Yes	Yes	No	Yes	Can't be determined	Can't be determined	Yes	Good
Jeppesen et al.2009	Yes	Yes	Yes	Yes	No	No	Can't be determined	Yes	Yes	No	Yes	Can't be determined	Can't be determined	Yes	Good
Kahouei et al. 2015	Yes	Yes	Can't be determined	Yes	No	No	Can't be determined	Yes	Yes	No	Yes	Can't be determined	Can't be determined	Yes	Fair
Kalkbrenner et al. 2021	Yes	Yes	Can't be determined	Yes	Yes	No	Can't be determined	Yes	Yes	No	Yes	Can't be determined	Can't be determined	Yes	Fair
Kayupova et al. 2017	Yes	Yes	Can't be determined	Yes	No	No	Can't be determined	Yes	Yes	No	Yes	Can't be determined	Can't be determined	Yes	Good
Kuyinu et al. 2020	Yes	Yes	Can't be determined	Yes	Yes	No	Can't be determined	Yes	Yes	No	Yes	Can't be determined	Can't be determined	Yes	Good
Lee et al. 2019	Yes	Yes	Can't be determined	Yes	No	No	Can't be determined	Yes	Yes	No	Yes	Can't be determined	Can't be determined	Yes	Good
Mathew et al. 2021	Yes	Yes	No	Yes	No	No	Can't be determined	Yes	Yes	No	Yes	Can't be determined	Can't be determined	Yes	Fair
Mehay et al. 2020	Yes	Yes	Yes	Yes	No	No	Can't be determined	Yes	Yes	No	Yes	Can't be determined	Can't be determined	Yes	Fair
Michou et al. 2020	Yes	Yes	Can't be determined	Yes	Yes	No	Can't be determined	Yes	Yes	No	Yes	Can't be determined	Can't be determined	Yes	Good
Milner et al. 2019	Yes	Yes	Can't be determined	Yes	No	No	Can't be determined	Yes	Yes	No	Yes	Can't be determined	Can't be determined	Yes	Good
Morris et al. 2020	Yes	Yes	Can't be determined	Yes	No	No	Can't be determined	Yes	Yes	No	Yes	Can't be determined	Can't be determined	No	Fair
Nadi et al. 2020	Yes	Yes	No	Yes	Yes	No	Can't be determined	Yes	Yes	No	Yes	Can't be determined	Can't be determined	Yes	Good
Noor et al. 2019	Yes	Yes	Can't be determined	Yes	No	No	Can't be determined	Yes	Yes	No	Yes	Can't be determined	Can't be determined	No	Fair
Panahi et al. 2019	Yes	Yes	Yes	Yes	Yes	No	Can't be determined	Yes	Yes	No	Yes	Can't be determined	Can't be determined	No	Fair
Ramlay et al. 2020	Yes	Yes	Can't be determined	Yes	Yes	No	Can't be determined	Yes	Yes	No	Yes	Can't be determined	Can't be determined	Yes	Fair
Sabbahi et al. 2019	Yes	Yes	Yes	Yes	No	No	Can't be determined	Yes	Yes	No	Yes	Can't be determined	Can't be determined	Yes	Fair
Shah et al. 2010	Yes	Yes	Can't be determined	Yes	No	No	Can't be determined	Yes	Yes	No	Yes	Can't be determined	Can't be determined	Yes	Good
Sharma et al. 2019	Yes	Yes	Can't be determined	Yes	No	No	Can't be determined	Yes	Yes	No	Yes	Can't be determined	Can't be determined	No	Fair
Shieh et al. 2009	Yes	Yes	No	Yes	No	No	Can't be determined	Yes	Yes	No	Yes	Can't be determined	Can't be determined	Yes	Fair
Shiferaw et al. 2020	Yes	Yes	Can't be determined	Yes	Yes	No	Can't be determined	Yes	Yes	No	Yes	Can't be determined	Can't be determined	Yes	Fair
Sistani et al. 2014	Yes	Yes	Can't be determined	Yes	No	No	Can't be determined	Yes	Yes	No	Yes	Can't be determined	Can't be determined	No	Fair
Sistani et al. 2013	Yes	Yes	No	Yes	Yes	No	Can't be determined	Yes	Yes	No	Yes	Can't be determined	Can't be determined	Yes	Fair
Tusbaishat et al. 2016	Yes	Yes	Yes	Yes	Yes	No	Can't be determined	Yes	Yes	No	Yes	Can't be determined	Can't be determined	No	Fair
Uysal et al. 2019	Yes	Yes	No	Yes	No	No	Can't be determined	Yes	Yes	No	Yes	Can't be determined	Can't be determined	Yes	Fair
Van der Vaart et al. 2011	Yes	Yes	Can't be determined	Yes	No	No	Can't be determined	Yes	Yes	No	Yes	Can't be determined	Can't be determined	Yes	Fair
Van Duong et al. 2020	Yes	Yes	Yes	Yes	No	No	Can't be determined	Yes	Yes	No	Yes	Can't be determined	Can't be determined	Yes	Good
Van Duong et al. 2017	Yes	Yes	Can't be determined	Yes	Yes	No	Can't be determined	Yes	Yes	No	Yes	Can't be determined	Can't be determined	Yes	Good
Van Duong et al. 2019	Yes	Yes	Can't be determined	Yes	Yes	No	Can't be determined	Yes	Yes	No	Yes	Can't be determined	Can't be determined	Yes	Fair
Vozikis et al. 2014	Yes	Yes	Can't be determined	Yes	No	No	Can't be determined	Yes	Yes	No	Yes	Can't be determined	Can't be determined	Yes	Fair
Yigitalp et al. 2021	Yes	Yes	Can't be determined	Yes	No	No	Can't be determined	Yes	Yes	No	Yes	Can't be determined	Can't be determined	Yes	Fair
Yilmazel et al. 2015	Yes	Yes	Can't be determined	Yes	No	No	Can't be determined	Yes	Yes	No	Yes	Can't be determined	Can't be determined	No	Good
